# Supplementary material
Source: PubMed Central journal article supplement (PMC3158718)
Supplement: supp_blood-2011-03-343145_Document1.pdf [file supp_blood-2011-03-343145_Document1.pdf]

## **Production and purification of DNL modules comprising C2-2b-2b**

The construction of the mammalian expression vector as well as the subsequent generation of the production clones and the purification of C<sub>H</sub>3-AD2-IgG modules have been reported previously.<sup>1-3</sup> The C<sub>H</sub>3-AD2-IgG-hL243 expression vector was generated by replacement of a Sac II/Eag I restriction fragment from the hL243 IgG<sub>1</sub>-pdHL2 vector with a Sac II/Eag I fragment that was excised from C<sub>H</sub>3-AD2-IgG-v-mab-pdHL2.<sup>1</sup> The expressed recombinant fusion protein has the AD2 peptide linked to the carboxyl terminus of the C<sub>H</sub>3 domain of hL243 IgG<sub>1</sub> via a 15 amino acid long flexible linker peptide. Co-expression of the heavy chain-AD2 and light chain polypeptides results in the formation of an IgG structure equipped with two AD2 peptides. The expression vector was transfected into Sp/ESF cells (an engineered cell line of Sp2/0) by electroporation. The pdHL2 vector contains the gene for dihydrofolate reductase, thus allowing clonal selection, as well as gene amplification with methotrexate (MTX). Stable clones were isolated from 96-well plates selected with media containing 0.2 μM MTX. Clones were screened for C<sub>H</sub>3-AD2-IgG-hL243 productivity via a sandwich ELISA. The module was produced in roller bottle culture with serum-free media.

The DDD-module, IFNα2b-DDD2, was generated by recombinant fusion of the DDD2 peptide to the carboxyl terminus of human IFNα2b via an 18 amino acid long flexible linker peptide.<sup>3</sup> As is the case for all DDD-modules, the expressed fusion protein spontaneously forms a stable homodimer. Using a full-length human IFNα2b cDNA clone as a template, cDNA was amplified by PCR resulting in a sequence comprising

XbaI---Signal peptide---IFN $\alpha$ 2b---6 His---BamHI, in which XbaI and BamHI are restriction sites, the signal peptide is native to IFN $\alpha$ 2b, and 6 His is a hexahistidine tag. The PCR amplicon was cloned into a DDD2-pdHL2 mammalian expression vector via Xba I and Bam HI restriction sites to generate the expression vector IFN $\alpha$ 2b-DDD2-pdHL2. The resulting secreted protein consists of IFN $\alpha$ 2b fused at its carboxyl terminus to a polypeptide with a 63-amino-acid sequence. The IFN $\alpha$ 2b-DDD2-pdHL2 vector was stably transfected into Sp/ESF myeloma cells by electroporation. Selection and production media was supplemented with 0.2  $\mu$ M MTX. Transfectant clones were selected in 96-well tissue culture plates and screened for IFN $\alpha$ 2b expression with a human interferon alpha ELISA kit (PBL Interferon Source, Piscataway, NJ). The IFN $\alpha$ 2b-DDD2 module was produced in fed-batch bioreactor culture.

C<sub>H</sub>3-AD2-IgG-hL243 and IFN $\alpha$ 2b-DDD2 were purified from the culture broths by affinity chromatography using MAbSelect (GE Healthcare) and His-Select HF Nickel Affinity Gel (Sigma), respectively, as described previously.<sup>3</sup>

The purity of the DNL modules was assessed by SDS-PAGE (Figure S1). Analysis under non-reducing conditions shows that, prior to the DNL reaction, IFN $\alpha$ 2b-DDD2 (lane 5) exists as disulfide-linked dimer. This phenomenon, which is always seen with DDD-modules, is beneficial, as it protects the reactive sulfhydryl groups from irreversible oxidation. In comparison, C<sub>H</sub>3-AD2-IgG-hL243 (lane 6) exists as both a monomer and a disulfide-linked dimer, and is reduced to monomer during the DNL reaction. SE-HPLC analyses agreed with the non-reducing SDS-PAGE results, indicating monomeric species as well as dimeric modules that were converted to monomeric forms upon reduction. The sulfhydryl groups are protected in both forms by participation in

disulfide bonds between AD2 cysteine residues. Reducing SDS-PAGE demonstrated that each module was purified to near homogeneity and identified the component polypeptides comprising each module. For C<sub>H</sub>3-AD2-IgG-hL243, heavy chain-AD2 and kappa light chains were identified. One major and one minor band (slightly higher mobility) were resolved for IFN $\alpha$ 2b-DDD2, which were determined to be non-glycosylated and O-glycosylated species, respectively.

### **Generation of C2-2b-2b by DNL**

Two molar equivalents of IFN- $\alpha$ 2b-DDD2 were combined with C<sub>H</sub>3-AD2-IgG-hL243 to generate the C2-2b-2b. Following an overnight docking step under mild reducing conditions (1 mM reduced glutathione) at room temperature, oxidized glutathione was added (2 mM) to facilitate disulfide bond formation (locking). C2-2b-2b was purified to near homogeneity using Protein A affinity chromatography.

### **Results**

Non-reducing SDS-PAGE resolved C2-2b-2b as a cluster of high relative mobility ( $M_r$ ) bands, similar to 20-2b-2b (Figure S1A). Purity was demonstrated by reducing SDS-PAGE, which resolved the three polypeptides (hL243 HC-AD2, hL243 kappa light chain & IFN $\alpha$ 2b-DDD2) comprising C2-2b-2b (Figure S1B).

SE-HPLC analysis of C2-2b-2b resolved a predominant protein peak with a retention time (7.89 min) consistent with its calculated mass, as well as a higher molecular weight peak of C2-2b-2b dimer formed via self-association of IFN $\alpha$ 2b (Figure S2A). C2-2b-2b bound quantitatively with anti-IFN $\alpha$  and hL243 anti-idiotypic (WT)

mAbs, resulting in the formation of high molecular weight immune complexes and the disappearance of the C2-2b-2b peak (Figure S2B). The size of the immune complex comprising C2-2b-2b/anti-IFN $\alpha$  (5.52 min) is larger than that of C2-2b-2b/WT (6.22 min), which is consistent with C2-2b-2b binding two molecules of anti-IFN $\alpha$  (to the four IFN $\alpha$ 2b) versus one molecule of WT (to hL243 IgG). The C<sub>H</sub>3-AD2-IgG-hL243 module and 20-2b-2b and did not react with anti-IFN $\alpha$  and WT, respectively.

### **LC/MS analysis**

Following reduction of C2-2b-2b, its five component polypeptides were resolved by RP-HPLC and individual ESI-TOF deconvoluted mass spectra were generated for each peak (Figure S2 and Table S1). Native, but not bacterially-expressed recombinant IFN $\alpha$ 2, is O-glycosylated at Thr-106.<sup>4</sup> We previously determined that ~15% of the polypeptides comprising the IFN $\alpha$ 2b-DDD2 module are O-glycosylated and can be resolved from the non-glycosylated polypeptides by RP-HPLC and SDS-PAGE, and LC/MS analysis indicated an O-linked glycan having the structure NeuGc-NeuGc-Gal-GalNAc.<sup>5</sup> LC/MS analysis of C2-2b-2b identified both the O-glycosylated and non-glycosylated species of IFN $\alpha$ 2b-DDD2 with mass accuracies of <12 ppm (Figure S2A). LC/MS identified the hL243 kappa polypeptide (Figure S2B) as a single, unmodified species, with an observed mass matching the calculated mass (9 ppm). Two major glycoforms of hL243 HC-AD2 were identified as having masses of 53,801.42 (77%) and 53,965.24 (23%), indicating G0F and G1F N-glycans, respectively, which are typically associated with IgG (Figure S2C). The analysis also confirmed that the amino terminus of

the HC-AD2 is modified to pyroglutamate, as predicted for polypeptides having an amino terminal glutamine.

## REFERENCES

1. Rossi EA, Goldenberg DM, Cardillo TM, Stein R, Wang Y, Chang CH. Novel designs of multivalent anti-CD20 humanized antibodies as improved lymphoma therapeutics. *Cancer Res* 2008;68:208384-8392.
2. Rossi EA, Goldenberg DM, Cardillo TM, Stein R, Chang CH. Hexavalent bispecific antibodies represent a new class of anticancer therapeutics: 1. Properties of anti-CD20/CD22 antibodies in lymphoma. *Blood* 2009;113:246161-6171.
3. Rossi EA, Goldenberg DM, Cardillo TM, Stein R, Chang CH. CD20-targeted tetrameric interferon-alpha, a novel and potent immunocytokine for the therapy of B-cell lymphomas. *Blood* 2009;114:183864-3871.
4. Adolf GR, Kalsner I, Ahorn H, Maurer-Fogy I, Cantell K. Natural human interferon-alpha 2 is O-glycosylated. *Biochem J* 1991;276 ( Pt 2):511-518.
5. Rossi EA, Rossi DL, Stein R, Goldenberg DM, Chang CH. A bispecific antibody-IFNalpha2b immunocytokine targeting CD20 and HLA-DR is highly toxic to human lymphoma and multiple myeloma cells. *Cancer Res* 2010;70:197600-7609.

**Table S1. liquid chromatography/mass spectrometry analysis of reduced C2-2b-2b**

| Polypeptide          | M <sub>obs</sub> | M <sub>calc</sub> | Δ(ppm) | Δ(mDa) | Modifications                      |
|----------------------|------------------|-------------------|--------|--------|------------------------------------|
| IFN $\alpha$ 2b-DDD2 | 26075.14         | 26074.94          | 7.7    | 200    | None                               |
|                      | 27055.25         | 27055.56          | 11.5   | 310    | NeuGc-NeuGc-Gal-GalNAc- (+979.852) |
| hL243 Kappa          | 23376.02         | 23376.23          | -9.0   | -210   | None                               |
| hL243-HC-AD2         | 53801.42         | 53802.92          | -28.0  | -1500  | pQ (-18); G0F (+1445.36)           |
|                      | 53965.24         | 53966.07          | -55.4  | -830   | pQ (-18); G1F (+1607.50)           |

M<sub>obs</sub> indicates observed LC/MS mass; M<sub>calc</sub>, calculated mass including indicated modifications; Δ(ppm), difference between M<sub>calc</sub> and M<sub>obs</sub> in parts per million; Δ(mDa), difference between M<sub>calc</sub> and M<sub>obs</sub> in millidaltons; pQ, pyroglutamate from amino terminal glutamine; G0F and G1F, N-linked glycans.

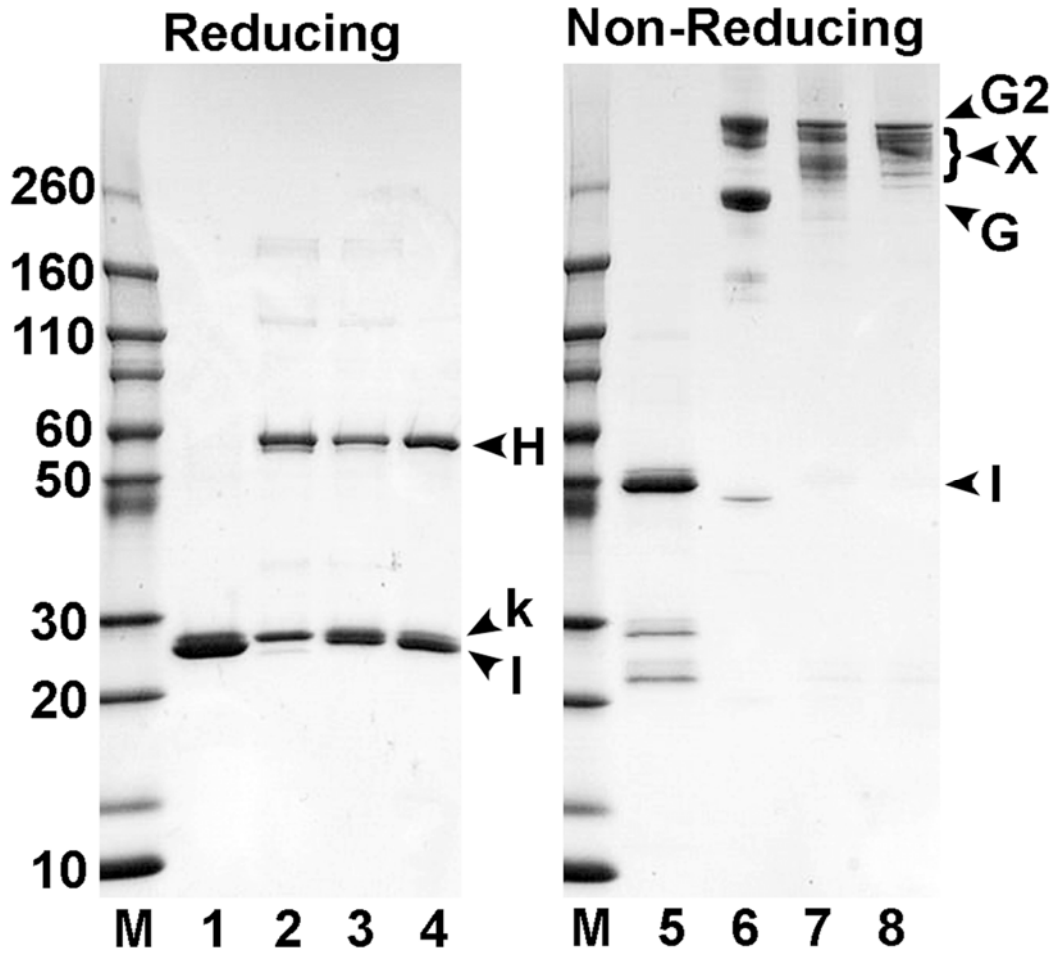

**Figure S1. SDS-PAGE analysis of C2-2b-2b.** Coomassie blue-stained SDS-PAGE of IFN $\alpha$ 2b-DDD2 (lane 1), C<sub>H</sub>3-AD2-IgG-hL243 (lane 2), C2-2b-2b (lane 3) and 20-2b-2b (lane 4) under reducing (left) and non-reducing (right) conditions. The positions of M<sub>r</sub> standards (lane M) are indicated on the left. The positions of IFN $\alpha$ 2b-DDD2 (I), heavy chain-AD2 (H) kappa light chain (k), C<sub>H</sub>3-AD2-IgG monomers (G), and dimers (G2) and mAb-IFN $\alpha$  (X) are indicated with arrow heads.

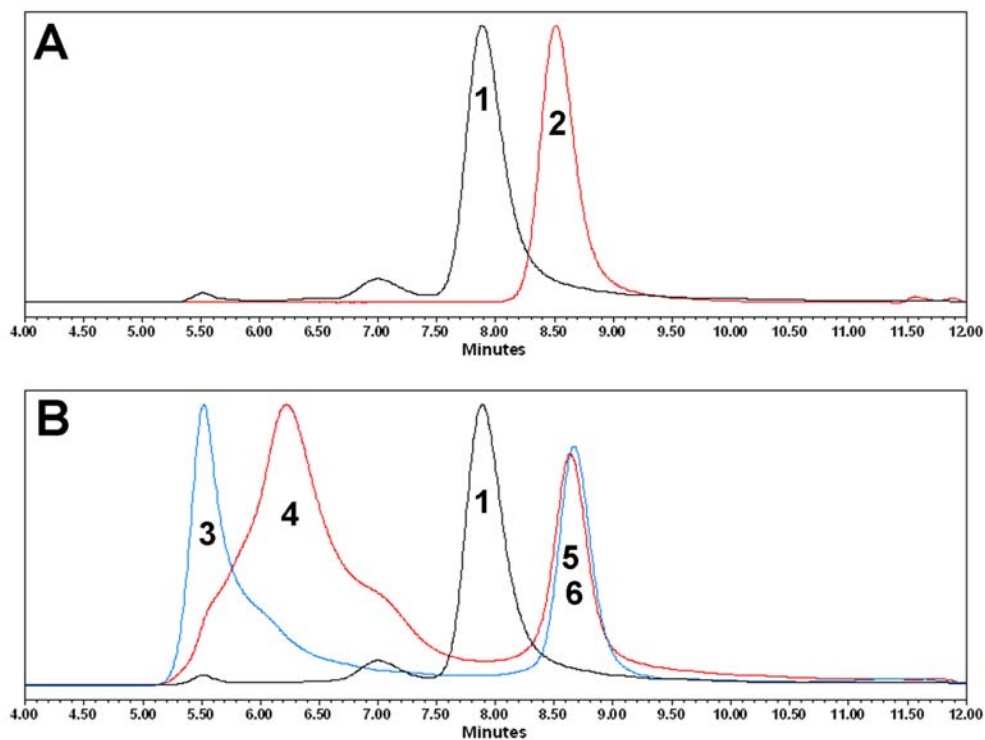

**Figure S2. Size exclusion HPLC and immunoreactivity.** (A) SE-HPLC analysis of C2-2b-2b (black trace) and  $C_{H3}$ -AD2-IgG-hL243 (red trace). (B) SE-HPLC showing C2-2b-2b (black trace) and its immunoreactivity with WT (red trace) and anti-IFN $\alpha$ 2 (blue trace). Peaks representing C2-2b-2b (1),  $C_{H3}$ -AD2-IgG-hL243 (2), C2-2b-2b/anti-IFN $\alpha$  immune complex (3), C2-2b-2b/WT immune complex (4), excess WT (5), and excess anti-IFN $\alpha$  (6) are indicated.



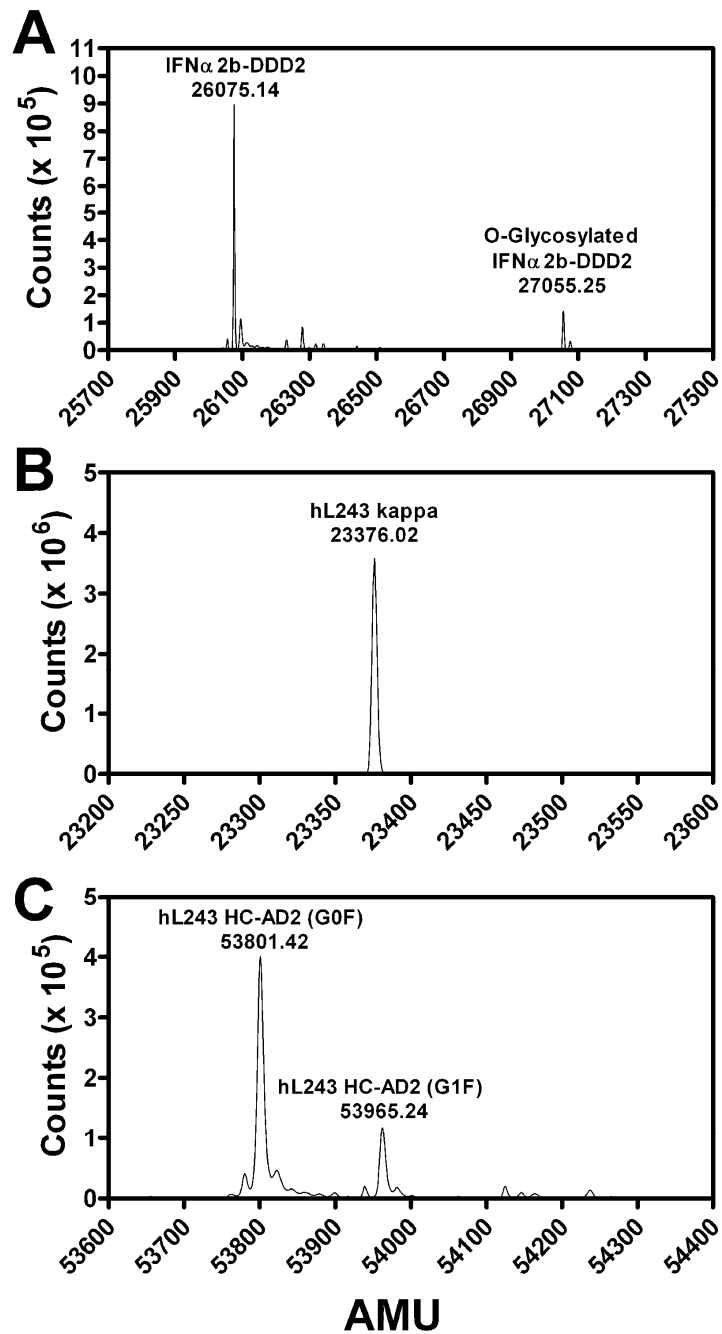

**Figure S3. LC/MS analysis of C2-2b-2b.** Deconvoluted masses shown graphically as atomic mass units (AMU) vs. abundance. Following reduction of C2-2b-2b with 50 mM TCEP, the IFN $\alpha$ 2b-DDD2 (A), hL243 kappa chain (B) and hL243 heavy chain-AD2 (C) polypeptides were resolved by RP-HPLC and the individual peaks were analyzed by ESI-TOF MS. The identified polypeptide species and observed mass are indicated above each peak.

# NHL

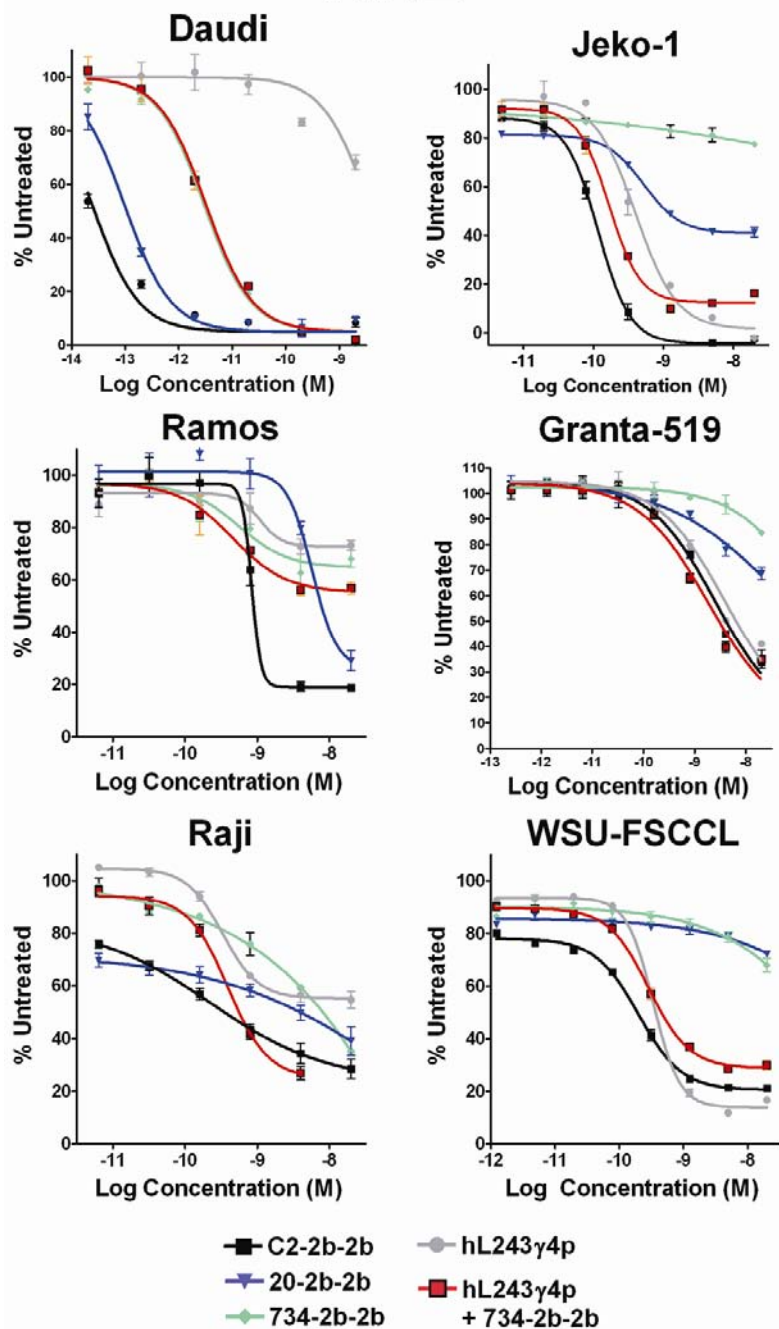

**Figure S4. *In-vitro* cytotoxicity of non-Hodgkin lymphoma cell lines.** Cells were cultured in 48-well plates in the presence of increasing concentrations of the indicated constructs or combination and the relative viable cell densities were measured with MTS after the density of untreated cells increased by a minimum of 10-fold (3-7 days). The percent of the signal obtained from untreated cells was plotted vs. the log of the molar concentration. Dose-response curves and  $IC_{50}$  values were generated using Prism software. Error bars, SD.

# Leukemia

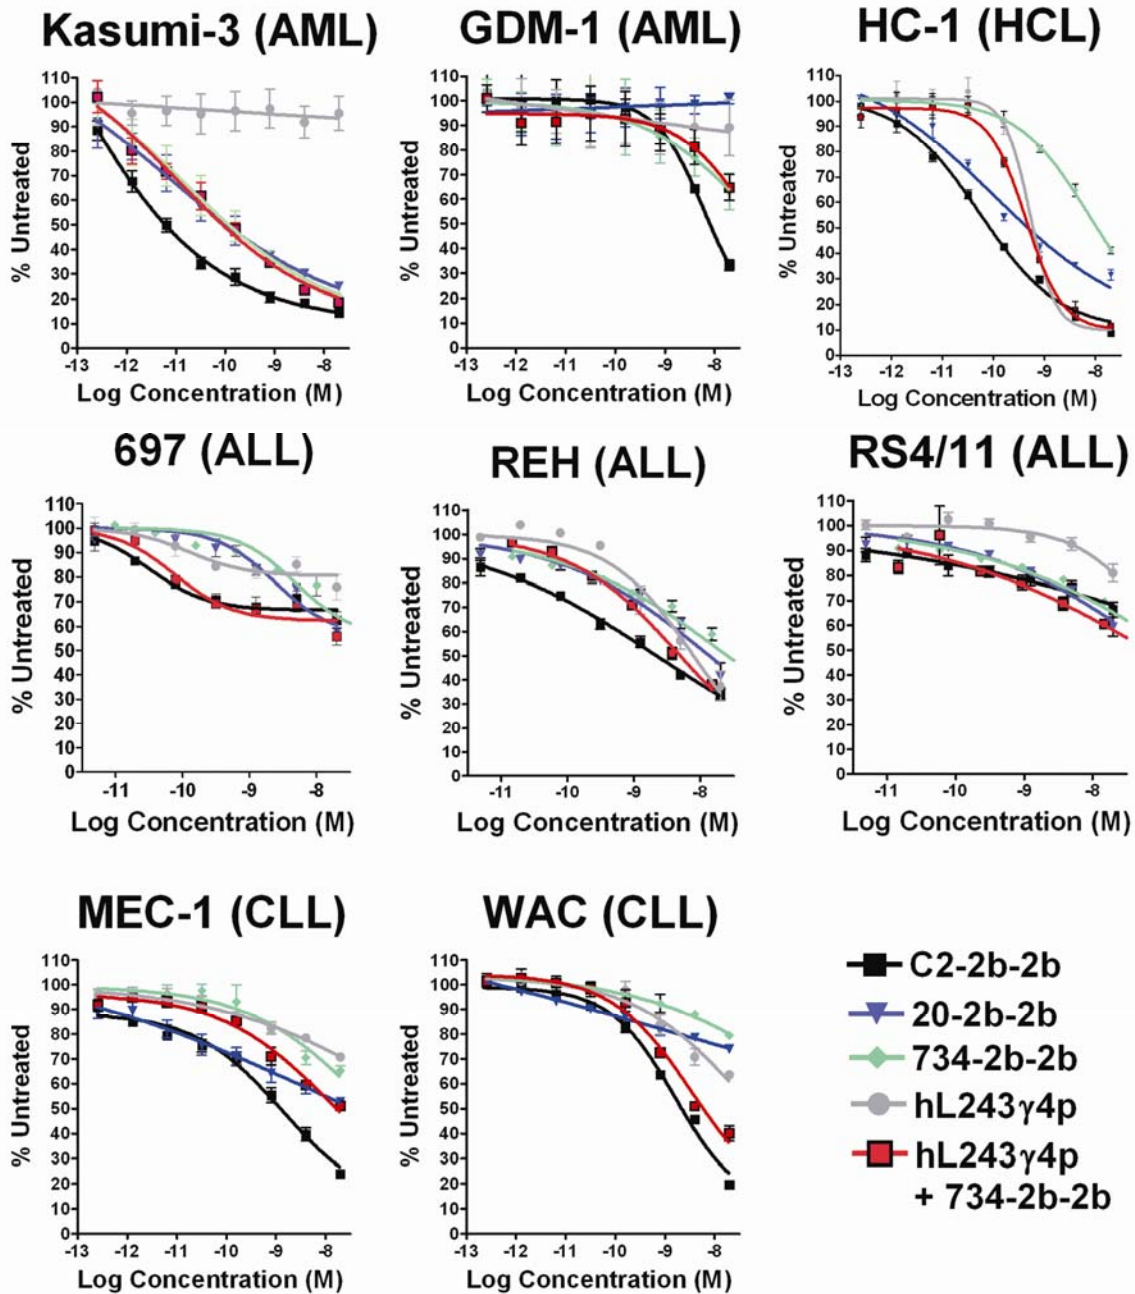

**Figure S5. *In-vitro* cytotoxicity of leukemia cell lines.** Cells were cultured in the presence of increasing concentrations of the indicated constructs or combination and the relative viable cell densities were measured with MTS after the density of untreated cells increased by a minimum of 10-fold (3-7 days). The percent of the signal obtained from untreated cells was plotted vs. the log of the molar concentration. Dose-response curves and IC<sub>50</sub> values were generated using Prism software. Error bars, SD.

# Multiple Myeloma

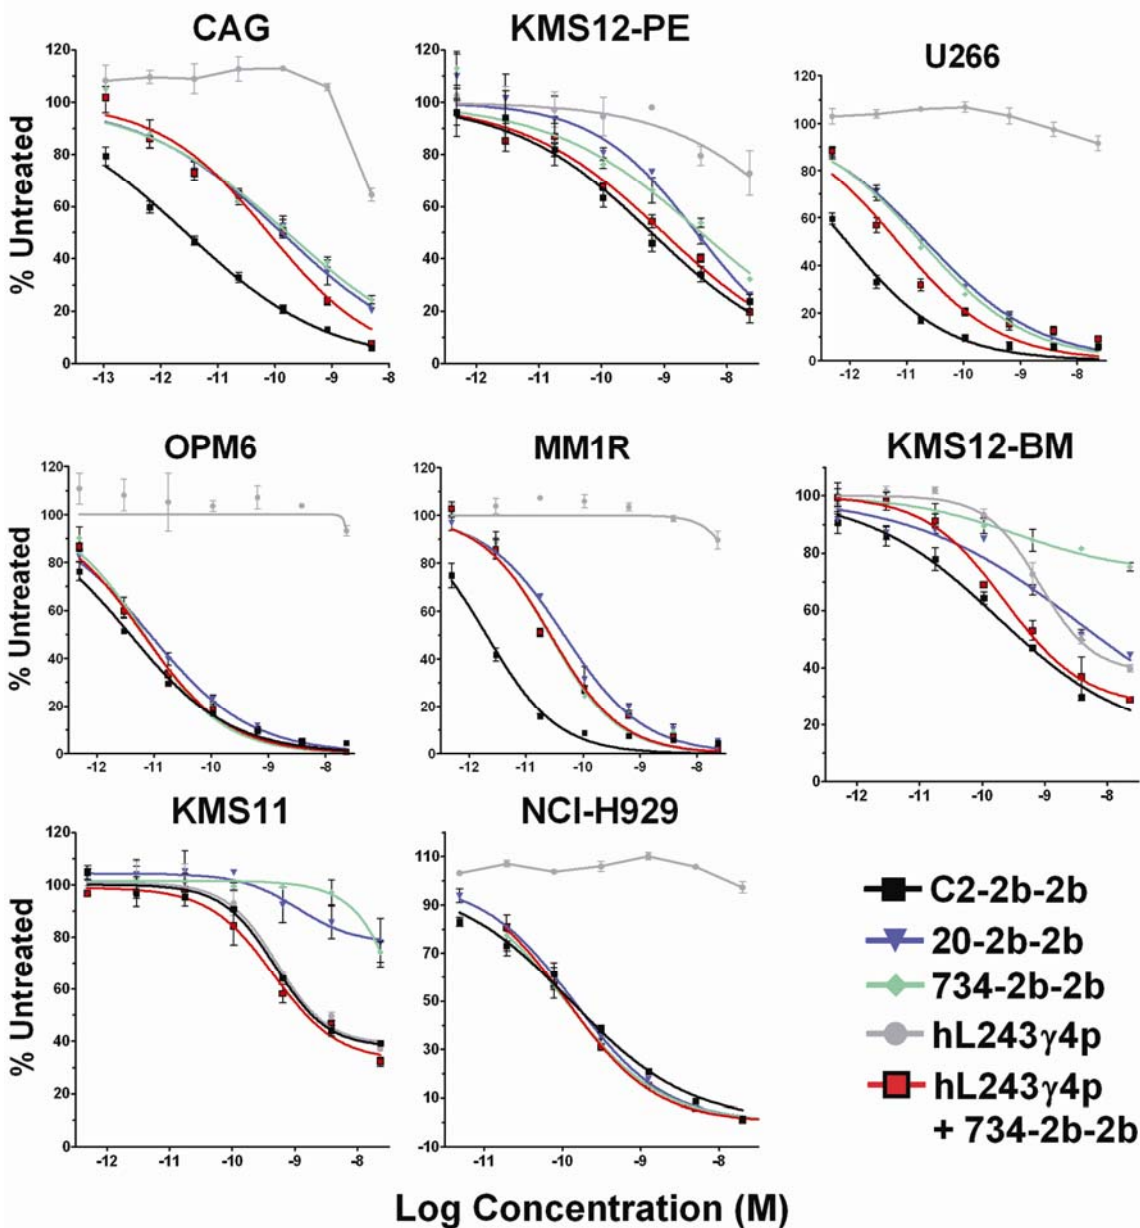

**Figure S6. *In-vitro* cytotoxicity of multiple myeloma cell lines.** Cells were cultured in the presence of increasing concentrations of the indicated constructs or combination and the relative viable cell densities were measured with MTS after the density of untreated cells increased by a minimum of 10-fold (3-7 days). The percent of the signal obtained from untreated cells was plotted vs. the log of the molar concentration. Dose-response curves and  $IC_{50}$  values were generated using Prism software. Error bars, SD.

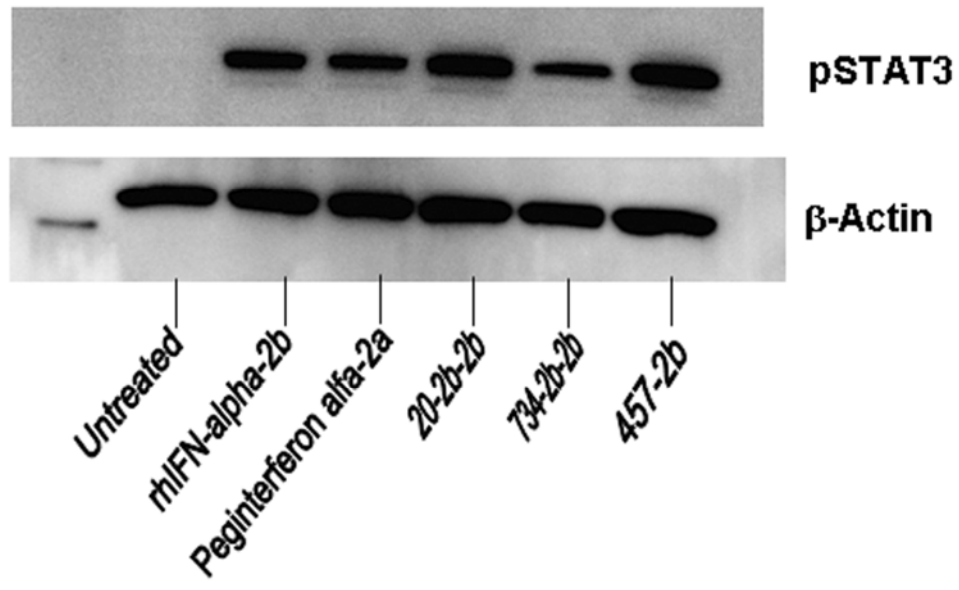

**Figure S7. Induction of STAT3 phosphorylation with IFN $\alpha$ .** Daudi cells ( $5 \times 10^7$  cells) were exposed to 100 U/mL of rhIFN $\alpha$ 2b, Peginterferonalfa-2a, 20-2b-2b, 734-2b-2b, or  $\alpha$ 2b-457 for 30 minutes. Loaded 10  $\mu$ g total protein/lane.
